# Supplementary material
Source: Springer Nature journal article supplement (https://www.springermedizin.de/resource/supplementary/12889_2010_2451_MOESM2_ESM.pdf/9485902)
Supplement: MOESM2 [file 9485902]

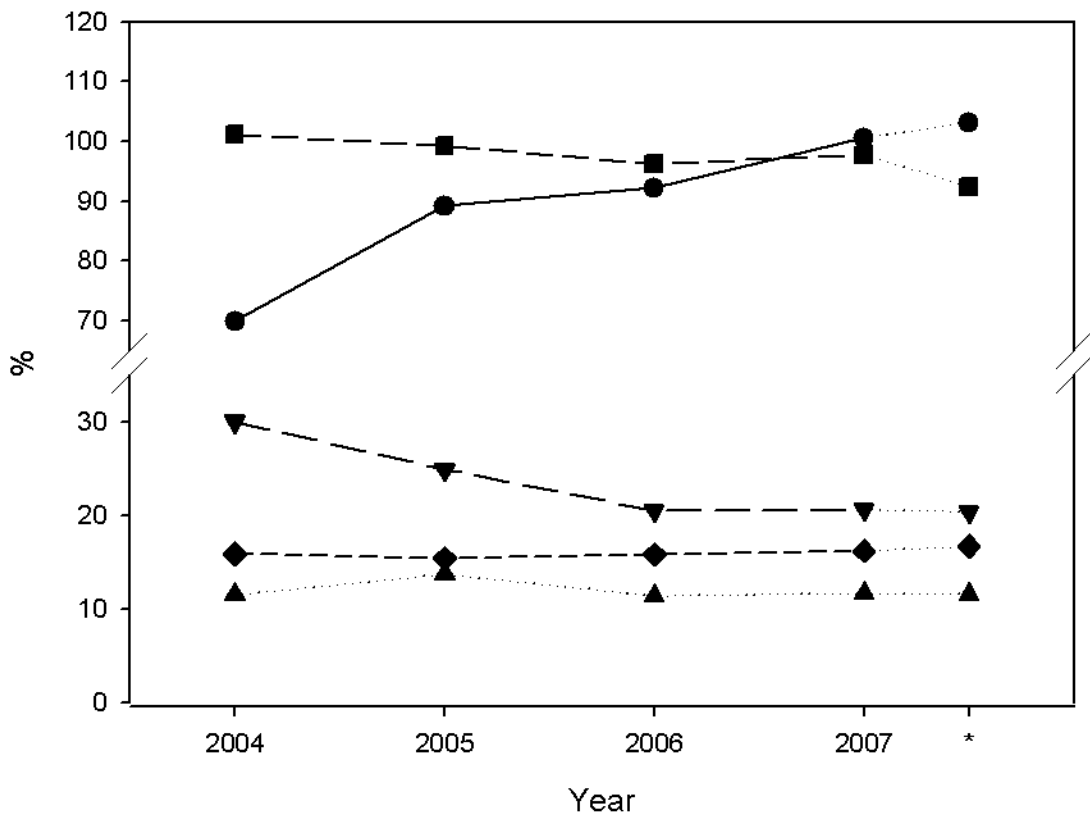

- PMTCT: HIV testing of new ANC (16 facilities)
- ▼— PMTCT: HIV positivity (16 facilities)
- PMTCT: Treatment of HIV positive (15 facilities)
- ◆— ANC for women of child-bearing age (29 facilities)
- ▲— Family Planning for women of child-bearing age (29 facilities)

\* includes 27 facilities for PMTCT & 32 facilities for ANC and family planning
